# Supplementary material for: Childhood traumatization is associated with differences in TRPA1 promoter methylation in female patients with multisomatoform disorder with pain as the leading bodily symptom
Source: PubMed Central journal article supplement (PMC6712620; doi:10.1186/s13148-019-0731-0), 2019-08-28

# Figure S2

**a**

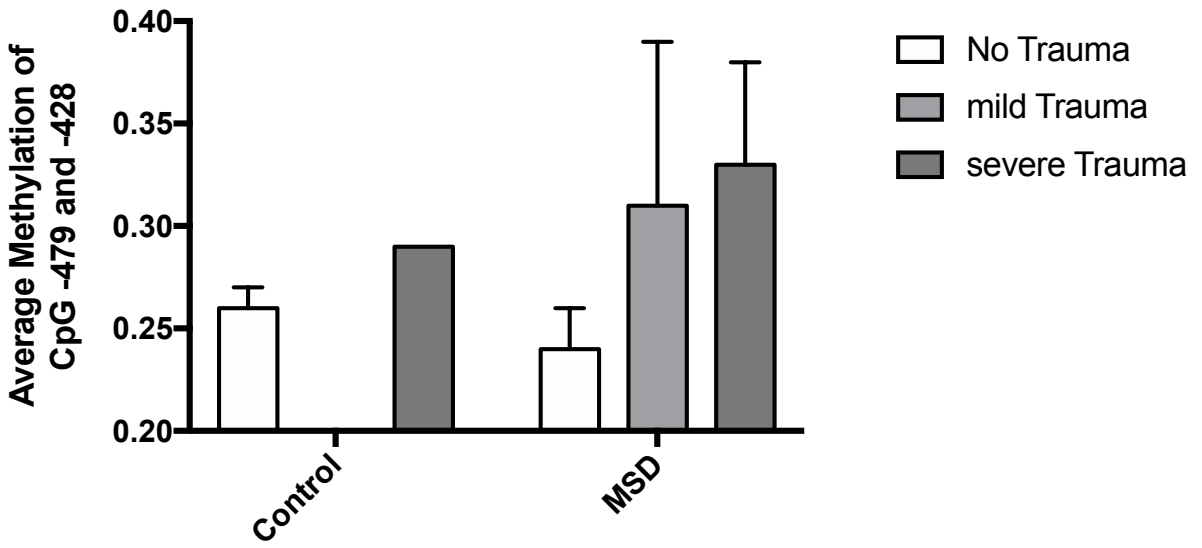

**b**

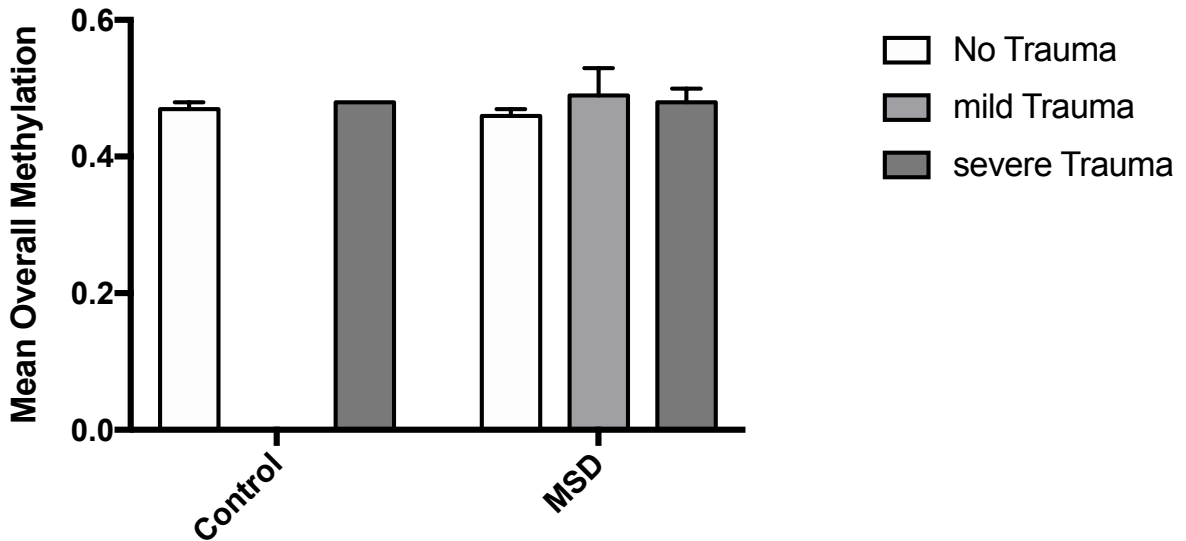

Supplement: 13148_2019_731_MOESM2_ESM.pdf [file 13148_2019_731_MOESM2_ESM.pdf]
