# Supplementary material for: Childhood traumatization is associated with differences in TRPA1 promoter methylation in female patients with multisomatoform disorder with pain as the leading bodily symptom
Source: Clin Epigenetics. 2019 Aug 28;11:126. doi: 10.1186/s13148-019-0731-0 (PMC6712620; doi:10.1186/s13148-019-0731-0)
Supplement: Supplementary file 3 — Table S1. Spearman correlations for selected variables (XLSX 17 kb) [file 13148_2019_731_MOESM3_ESM.xlsx]

## Sheet: Sheet1
Spearman- Correlation for Women
			CpG -480	CpG -429	CpG -429 CpG -480 mean	Pressure pain threshold control side [kPa]	Pressure pain threshold test side [kPa]	CTQ severity score
Control group	CpG -480	Correlation Coefficient	1	0.0338231	.309**	0.157234	0.124711	0.0794552
		Sig. (2-tailed)		0.705798	0.000415762	0.0850068	0.17291	0.388334
		N	127	127	127	121	121	120
	CpG -429	Correlation Coefficient	0.0338231	1	.936**	-0.160414	-0.120726	-0.107605
		Sig. (2-tailed)	0.705798		1.62349e-58	0.0788088	0.187159	0.242075
		N	127	127	127	121	121	120
	CpG -429 CpG-480mean	Correlation Coefficient	.309**	.936**	1	-0.102509	-0.099067	-0.0525954
		Sig. (2-tailed)	0.000415762	1.62349e-58		0.263208	0.279658	0.568326
		N	127	127	127	121	121	120
	Pressure pain threshold control side [kPa]	Correlation Coefficient	0.157234	-0.160414	-0.102509	1	.492**	-0.0713008
		Sig. (2-tailed)	0.0850068	0.0788088	0.263208		5.87116e-09	0.440961
		N	121	121	121	125	125	119
	Pressure pain threshold test side [kPa]	Correlation Coefficient	0.124711	-0.120726	-0.099067	.492**	1	-0.124138
		Sig. (2-tailed)	0.17291	0.187159	0.279658	5.87116e-09		0.178591
		N	121	121	121	125	125	119
	CTQ severity score	Correlation Coefficient	0.0794552	-0.107605	-0.0525954	-0.0713008	-0.124138	1
		Sig. (2-tailed)	0.388334	0.242075	0.568326	0.440961	0.178591
		N	120	120	120	119	119	124
FMS group	CpG -480	Correlation Coefficient	1	0.0527367	.298**	0.124024	-0.0360668	-.265**
		Sig. (2-tailed)		0.56238	0.000810678	0.1735	0.693287	0.00499653
		N	123	123	123	122	122	111
	CpG -429	Correlation Coefficient	0.0527367	1	.940**	-0.108633	-0.115966	-.214*
		Sig. (2-tailed)	0.56238		2.62173e-58	0.233627	0.203373	0.0239855
		N	123	123	123	122	122	111
	CpG -429 CpG-480mean	Correlation Coefficient	.298**	.940**	1	-0.0529155	-0.09393	-.295**
		Sig. (2-tailed)	0.000810678	2.62173e-58		0.562684	0.303439	0.00167278
		N	123	123	123	122	122	111
	Pressure pain threshold control side [kPa]	Correlation Coefficient	0.124024	-0.108633	-0.0529155	1	.526**	0.00925161
		Sig. (2-tailed)	0.1735	0.233627	0.562684		4.71395e-11	0.919106
		N	122	122	122	136	136	123
	Pressure pain threshold test side [kPa]	Correlation Coefficient	-0.0360668	-0.115966	-0.09393	.526**	1	0.0952094
		Sig. (2-tailed)	0.693287	0.203373	0.303439	4.71395e-11		0.294858
		N	122	122	122	136	136	123
	CTQ severity score	Correlation Coefficient	-.265**	-.214*	-.295**	0.00925161	0.0952094	1
		Sig. (2-tailed)	0.00499653	0.0239855	0.00167278	0.919106	0.294858
		N	111	111	111	123	123	124

## Sheet: CpG CTQ subscore correlations
		CTQ emotional abuse subscale	CTQ physical abuse subscale	CTY sexual abuse subscale	CTQ emotional neglect subscale	CTQ physical neglect subscale	CTQ Overal Sum Score
CPG -734 methylation	Correlation Coefficient	0.0270394	0.0081987	0.0180456	0.0485439	0.0388281	0.0471411
	Sig. (2-sided)	0.665533	0.89553	0.772555	0.43841	0.53468	0.451773
CpG -720 methylation	Correlation Coefficient	-0.0266472	-0.0779432	-0.0370091	-0.0414554	-0.00714	-0.0733777
	Sig. (2-seitig)	0.668885	0.209451	0.551686	0.506549	0.908781	0.239284
CpG -628 methylation	Correlation Coefficient	-0.0652396	-0.121127	0.0238187	-0.061907	2.2812e-05	-0.079862
	Sig. (2-sided)	0.294637	0.0506219	0.701713	0.320987	0.999708	0.200163
CpG -480 methylation	Correlation Coefficient	-,167**	-0.0887702	-,136*	-,146*	-0.113975	-,161**
	Sig. (2-sided)	0.00711573	0.152697	0.0280114	0.019134	0.0665175	0.00954872
CpG -452 methylation	Correlation Coefficient	-0.042679	-0.000383015	-0.0118366	-0.0438757	0.00359116	-0.0471857
	Sig. (2-sided)	0.493233	0.995087	0.849063	0.482033	0.954046	0.449571
CpG -429 methylation	Correlation Coefficient	-0.0947081	-,176**	-,129*	-,155*	-0.0971026	-,131*
	Sig. (2-sided)	0.127711	0.00437912	0.0378495	0.0125313	0.118316	0.0347737
CpG -412 methylation	Correlation Coefficient	-0.0694486	-0.115017	-0.0697179	-0.0862569	0.0151632	-0.0636032
	Sig. (2-sided)	0.266381	0.0645715	0.263594	0.168008	0.80848	0.309775
Mean Methylation	Correlation Coefficient	-0.117387	-,169**	-0.0967229	-,136*	-0.0303737	-,135*
	Sig. (2-sided)	0.0587266	0.00625822	0.119052	0.0288399	0.625894	0.0301337
